# Supplementary material for: Exploring ammonium tolerance in a large panel of Arabidopsis thaliana natural accessions
Source: PubMed Central journal article supplement (PMC4203136; doi:10.1093/jxb/eru342), 2014-09-09

**Exploring ammonium tolerance in a large panel of *Arabidopsis thaliana*  
natural accessions**

*Asier Sarasketa, María Begoña González-Moro, Carmen González-Murua  
and Daniel Marino*

**Supplementary data**

**Tables S1, S2** – see separate file

**Table S3.** Full and Akaikes information criterion (AIC)-selected best multiple regression models of *Arabidopsis thaliana* rosette biomass under  $\text{NH}_4^+$  or  $\text{NO}_3^-$  nutritions. Selection gradients ( $\beta$ ) and standard errors (SE) are presented along with P-values. Significant selection gradients are presented in bold.

|                                   | <b>Biomass (<math>\text{NH}_4^+</math>-fed)</b> |              |                         |              | <b>Biomass (<math>\text{NO}_3^-</math>-fed)</b> |              |                         |              |
|-----------------------------------|-------------------------------------------------|--------------|-------------------------|--------------|-------------------------------------------------|--------------|-------------------------|--------------|
|                                   | Full model                                      |              | AIC-selected best model |              | Full model                                      |              | AIC-selected best model |              |
|                                   | $\beta \pm \text{SE}$                           | P value      | $\beta \pm \text{SE}$   | P value      | $\beta \pm \text{SE}$                           | P value      | $\beta \pm \text{SE}$   | P value      |
| <b><math>\text{NH}_4^+</math></b> | <b>-6,011 ± 2,717</b>                           | <b>0,033</b> | <b>-7,382 ± 2,185</b>   | <b>0,002</b> | <b>-12,27 ± 5,64</b>                            | <b>0,006</b> | <b>-14,307 ± 5,161</b>  | <b>0,008</b> |
| <b>Amino acids</b>                | -0,284 ± 0,183                                  | 0,128        | -                       | -            | <b>-1,246 ± 0,561</b>                           | <b>0,032</b> | <b>-1,474 ± 0,528</b>   | <b>0,008</b> |
| <b>NR activity</b>                | -94,95 ± 86,21                                  | 0,337        | -                       | -            | 13,24 ± 20,19                                   | 0,316        | -                       | -            |
| <b>GS activity</b>                | -3,081 ± 15,16                                  | 0,586        | -                       | -            | -22,84 ± 15,88                                  | 0,158        | -                       | -            |
| <b>GDHam activity</b>             | 0,792 ± 0,713                                   | 0,274        | -                       | -            | 0,094 ± 0,757                                   | 0,902        | -                       | -            |
| <b>GDHdeam activity</b>           | 0,013 ± 4,160                                   | 0,824        | -                       | -            | 4,523 ± 2,569                                   | 0,086        | -                       | -            |
|                                   | $r^2$ 0.19                                      |              | $r^2$ 0.19              |              | $r^2$ 0.39                                      |              | $r^2$ 0.39              |              |

**Figure S1.** Scatter plots of amino acids versus ammonium content of leaves of *Arabidopsis thaliana* grown under  $\text{NH}_4^+$  and  $\text{NO}_3^-$ . Linear regression equations and person  $r^2$  are given.

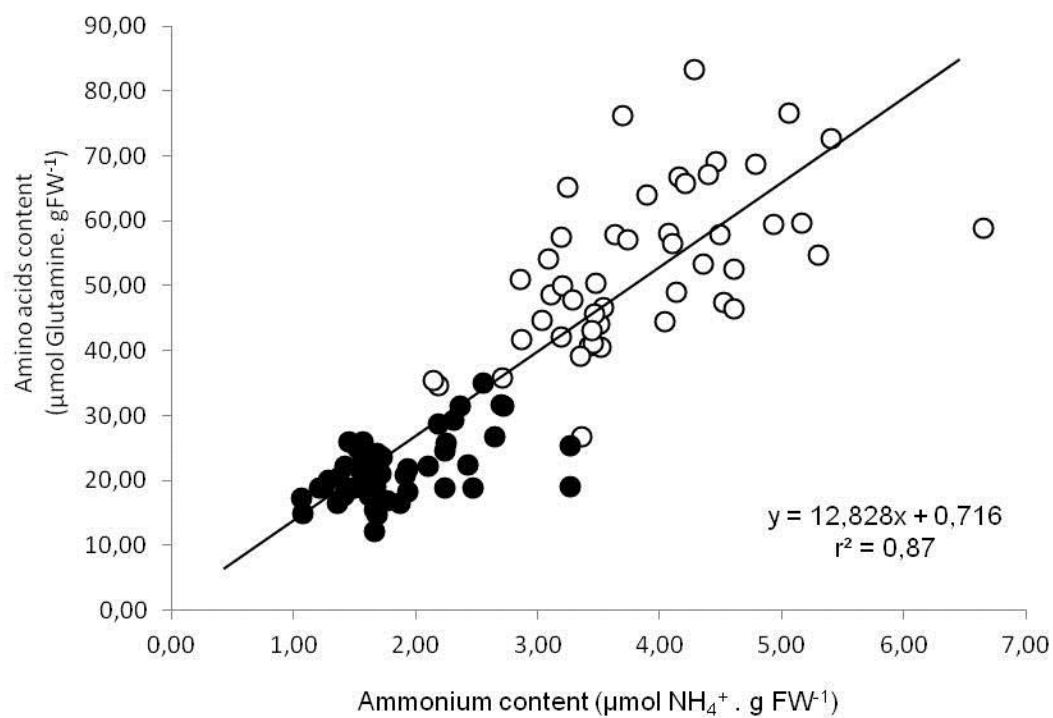

Supplement: supp_eru342_jexbot127829_file002.pdf [file supp_eru342_jexbot127829_file002.pdf]
